# Supplementary material for: Implementing health communication tools at scale: mobile audio messaging and paper-based job aids for front-line workers providing community health education to mothers in Bihar, India
Source: HighWire-hosted journal article supplement (doi:10.1136/bmjgh-2021-005538), 2021-07-01
Supplement: bmjgh-2021-005538supp001_data_supplement.pdf [file bmjgh-2021-005538supp001_data_supplement.pdf]

### Supplemental Tables

**Supplemental Table 1:** National Family Health Survey [NFHS-3 (2005/2006) and NFHS-4 (2015/2016)] data for India (nationwide) and Bihar

| Indicator                                           | NFHS-3<br>(2005-2006)<br>Bihar | NFHS-4<br>(2015-2016)<br>Bihar | NFHS-3<br>(2005-2006)<br>India | NFHS-4<br>(2015-2016)<br>India |
|-----------------------------------------------------|--------------------------------|--------------------------------|--------------------------------|--------------------------------|
| Female literacy (age 15-49)                         | 37.0%                          | 49.6%                          | 55.1%                          | 68.4%                          |
| Contraception prevalence rate                       | 34.1%                          | 24.1%                          | 56.3%                          | 53.5%                          |
| 4 or more ANC visits                                | 11.2%                          | 14.4%                          | 37.0%                          | 51.2%                          |
| Institutional delivery rate                         | 19.9%                          | 63.8%                          | 38.7%                          | 78.9%                          |
| Fully immunised children,<br>ages 12-23 months      | 32.8%                          | 61.7%                          | 43.5%                          | 62.0%                          |
| Children under 6 months<br>exclusively breastfed    | 28.0%                          | 53.5%                          | 46.4%                          | 54.9%                          |
| Iron-folic acid tablet<br>consumption for 100+ days | 6.3%                           | 9.7%                           | 15.2%                          | 30.3%                          |

**Source:** National Family Health Survey, India: <http://rchiips.org/nfhs/>

**Supplemental Table 2:** The number of maternal respondents who reported having been exposed versus unexposed to the GSP tool for health message delivery during a recent VHSND.

| Health Message                                                                   | Exposed | Unexposed |
|----------------------------------------------------------------------------------|---------|-----------|
| Consumption of iron folic acid (IFA)                                             | 157     | 1128      |
| Knowledge of growth monitoring                                                   | 83      | 2525      |
| Knowledge of birth preparedness                                                  | 286     | 2322      |
| Practice of birth preparedness activities (currently pregnant women)             | 166     | 1128      |
| Knowledge of complementary feeding                                               | 360     | 2248      |
| Initiation of complementary feeding at 6 months (mothers of children <12 months) | 138     | 582       |
| Knowledge of pneumonia care                                                      | 199     | 2409      |
| Knowledge of tetanus toxoid (TT) vaccine                                         | 250     | 2358      |
| Practice TT vaccine (currently pregnant women)                                   | 156     | 1120      |
| Practice of immunisation (mothers with $\geq 1$ child)                           | 121     | 1221      |
| Plans to use contraception                                                       | 159     | 2275      |
| Current use of contraception (non-pregnant women)                                | 110     | 1202      |

**Supplemental Table 3:** The number of maternal respondents who reported having been exposed versus unexposed to the IPC tool for health message delivery during a recent VHSND.

| Health Message                                                                                       | Exposed | Unexposed |
|------------------------------------------------------------------------------------------------------|---------|-----------|
| Consumption of iron folic acid (IFA)                                                                 | 416     | 1586      |
| Current use of IFA (currently pregnant women)                                                        | 215     | 756       |
| Child had an instance of diarrhoea in the last 3 months (among women with children $\leq 12$ months) | 215     | 786       |
| Knowledge of diarrhoea management                                                                    | 387     | 1615      |
| Use of ORS or zinc if diarrhoea occurred                                                             | 24      | 89        |
| Knowledge of birth spacing                                                                           | 333     | 1492      |
| Plan to use contraception                                                                            | 320     | 1564      |
| Current use of contraception                                                                         | 183     | 817       |

**Supplemental Table 4.** Amongst those women who reported having discussed the health topic they had heard about via the GSP tool at VHSND sessions with another person, comparison of those with whom they spoke about the topic.

|                               | Growth monitoring | Pneumonia | Birth preparedness | Complementary feeding | Antenatal check-ups | Birth spacing | Diarrhoea management | Immunisation |
|-------------------------------|-------------------|-----------|--------------------|-----------------------|---------------------|---------------|----------------------|--------------|
| Sample size (n)               | 98                | 211       | 381                | 446                   | 331                 | 135           | 42                   | 162          |
| With whom did you discuss (%) |                   |           |                    |                       |                     |               |                      |              |
| Husband                       | 66.3              | 63.5      | 70.9               | 62.5                  | 62.2                | 62.2          | 66.7                 | 69.8         |
| Mother-in-law                 | 49.0              | 49.8      | 46.7               | 43.3                  | 54.4                | 42.2          | 47.6                 | 50.6         |
| Friend/neighbour              | 29.6              | 36.5      | 28.6               | 30.7                  | 30.5                | 26.7          | 19.1                 | 22.8         |
| Other family member/relative  | 20.4              | 19.4      | 26.8               | 25.3                  | 22.9                | 23.7          | 21.4                 | 22.8         |
| AWW                           | 8.2               | 1         | 3.7                | 3.1                   | 3.9                 | 5.2           | 4.8                  | 2.5          |
| ASHA                          | 3.1               | 1         | 3.2                | 3.1                   | 4.2                 | 3.7           | 7.1                  | 3.1          |
| ANM                           | 0                 | 0         | 1.1                | 0.9                   | 0.9                 | 0.7           | 0                    | 0            |
| Someone Else                  | 0                 | 0         | 0                  | 0                     | 0                   | 0             | 0                    | 0            |
| Don't know/<br>Don't remember | 3.1               | 2.4       | 0.8                | 97.3                  | 1.2                 | 0.7           | 4.8                  | 1.2          |

AWW = Anganwadi worker, ASHA = Accredited Social Health Activist, ANM = Auxiliary Nurse Midwife

**Supplemental Table 5.** Those who reported having had discussion regarding a topic they had learned about following attendance at a VHSND, comparing women who had been exposed to the IPC tool with those who were unexposed.

| Topic*               | % Unexposed (N) | % Exposed (N) | OR (95% CI) †     |
|----------------------|-----------------|---------------|-------------------|
| IFA                  | 64.3 (199)      | 77.8 (167)    | 2.1 (1.3 – 3.3)   |
| Diarrhoea management | 65.8 (79)       | 78.7 (89)     | 2.0 (1.0 – 4.1) ‡ |
| Birth spacing        | 74.4 (156)      | 75.9 (145)    | 1.2 (0.7 – 2.0)   |

\*Missing a valid response: IFA: 21, diarrhoea management: 7, birth spacing: 9

† All models adjusted for age, caste, religion and birth order

‡ p-value = 0.05
